# INDEX OF AUTHORS AND SUBJECTS • VOLUME 30

**Index of Issues:** January, pp. 1-124; February, pp. 125-256; March, pp. 257-360; April, pp. 361-480; May, pp. 481-586; June, pp. 587-680.

Author entries for original articles include the titles of the articles and co-authors under the first author; reference is made from the joint authors.

Subject entries for all material in the JOURNAL (except Literature Briefs and Book Reviews) appear in this index. The name of the author of an original article, in brackets, follows the subject entry. Entries from the JOURNAL departments are identified by the departments in which the subject matter appears, e.g., Editorial, Clinical Workshop, Abstract.

Abstracts, work in progress, 335

Acid-base status of fetus, effect of anesthesia on (clinical workshop), 238

Acidosis

effect on CO<sub>2</sub> titration [Mithoefer & others], 395  
effects on glycolysis and pentose shunt in skeletal muscle (abstract), 348

Adrenalectomy for Cushing's syndrome (clinical workshop), 574

Aerosols: see also Ultrasonic mists; Nebulization  
inhaled, effects of (medical intelligence) [Graff & Benson], 199

Age and halothane requirement [Gregory & others], 488

Airway dynamics, conference on (report of meeting) [Motoyama], 580

Airway obstruction

respiratory depression in sedated patients with [Gold & others], 492

Airways: see also Lungs

effects of scopolamine on [Smith & DuBois], 12

Alcoholics, anesthesia requirements (abstract), 341

ALLEN, T., see DELEMONS, R., jt. auth.

ALTURA, B. M., see HERSHEY, S. G., jt. auth. (2)

Analgesics, evaluation (abstract), 342

ANDERSEN, N. B., Anesthetics and cell division (editorial), 361

—, Effects of sodium thiopental and catecholamines on sodium transport in toad bladder *in vitro* (abstract), 335

ANDERSEN, T. W., see FIELDER, D. L., jt. auth.

Anesthesia: see also under Anesthetic agents  
acid-base status of fetus during (clinical workshop), 238

brachial plexus block (clinical workshop), 332

epidural, venous system in cardiopulmonary dynamics during [Shimosato & Etsten], 619

for cardiac transplants [Keats & others], 192

for neurosurgery (review) [Michenfelder & others], 65

general, pulmonary hemodynamics during [Price & others], 629

history [Keys], 447

physiologic shunt and cardiac output during [Yamamura & others], 406

reserpinized patient, hazard to (medical intelligence) [Ominsky & Wollman], 443

second gas effect [Stoelting & Eger], 273

spinal, using a 32-gauge needle [Frumin], 599

spinal, venous system in cardiopulmonary dynamics during [Shimosato & Etsten], 619

spinal with lidocaine, neurologic complications [Phillips & others], 284

ventilation and anesthetic solubility effects on recovery [Stoelting & Eger], 290

Anesthesiologist's Bookshelf (book reviews), 583

ANESTHESIOLOGY, change to monthly publication (editorial) [Vandam], 1

Anesthetic agents: see also specific agents and compounds

cell division and (editorial) [Andersen], 361

depression of oxygen uptake in cell culture by [Fink & others], 150

immunosuppressants in transplant therapy (clinical workshop), 235

local, convulsant doses in the cat [Tuttle & Elliott], 48

local, seizures caused by (editorial) [de Jong], 5

mechanisms of action (editorial) [Miller], 127

percutaneous loss [Stoelting & Eger], 278

potencies, H-reflex as a measure of [Freund & others], 642

uptake in infants and children [Salanitro & Rackow], 388

volatile, effects on nonexcitable tissue (abstract), 345

volatile, uptake and metabolism of chloroform in the mouse [Cohen & Hood], 306

Anesthetists

occupational exposure to halothane, nitrous oxide and radiation [Linde & Bruce], 363

Anticholinesterases, reversibility of tachyphylaxis to decamethonium by [Freund], 7

Antifoaming agent (ethyl alcohol), effect on pulmonary surfactant [Modell & others], 164

Apparatus and equipment

Block-Aid monitor, electromechanical response to stimulation by [Epstein & others], 43

Block-Aid monitor in nerve blocks (clinical workshop), 236

computer, in analysis of anesthetic records (clinical workshop), 565

- contamination of drug vials in anesthesia machines (clinical workshop), 465  
 cuffs, tracheostomy (abstract), 336  
 inhalation anesthetic equipment, standardization (clinical workshop), 112  
 mask, anesthetic (clinical workshop), 244  
 needle, 32-gauge, in spinal anesthesia [Frumin], 599  
 oro-endotracheal tube brace for infants (clinical workshop), 333  
 stethoscope approximator (letter to the editor of clinical workshop), 334  
 valve, Columbia pediatric circle for respiratory studies in the neonate (clinical workshop), 330  
 vaporizer in accidental delivery of liquid halothane (clinical workshop), 246  
 ventilators, physical properties in inspiratory phase (technical study) [Peslin], 315
- Arrhythmias: see under Heart
- Arterial-mixed venous blood oxygen content difference during anesthesia [Yamamura & others], 406
- Atelectasis: see under Lungs
- Atropine  
   cardiovascular effects [Fielder & others], 637
- AUKBERG, S., see MARSHALL, B. E., jt. auth.
- Australian Society of Anaesthetists (report of meeting) [Eckenhoff], 580
- Autonomic nervous system: see under Nervous system
- Autoradiography, low-temperature, in studies of chloroform uptake and metabolism in the mouse [Cohen & Hood], 306
- AVERY, M. E., see DE LEMOS, R., jt. auth.
- Bacterial contamination of drug vials in anesthesia machines (clinical workshop), 465
- BAILEY, G., see BASTRON, R. D., jt. auth.
- BANAS, J. S., JR., see DALEN, J. E., jt. auth.
- BARATZ, R. A., and KARIS, J. H., Blood gas studies during laparoscopy under general anesthesia (clinical workshop), 463
- Barbiturates  
   depression of oxygen uptake in cell culture by [Fink & others], 150  
   respiratory depression in sedated bronchitic patients [Gold & others], 492
- BASTRON, R. D., BAILEY, G., DEUTSCH, S., and VANDAM, L. D., Anesthesia for patients with chronic renal failure for renal homotransplantation (abstract), 335
- BAUER, R. O., see WEISMAN, H., jt. auth.
- BENSON, D. W., see GRAFF, T. D., jt. auth.
- BERGMAN, N. A., Properties of passive exhalations in anesthetized subjects, 378
- BERLIN, A. M., see WOO, S. W., jt. auth.
- BLACK, M. H., see PHILLIPS, O. C., jt. auth.
- BLOCK, A. J., see DE LEMOS, R., jt. auth.
- Block, nerve: see under Anesthesia; Nerve block; Neuromuscular block
- Block-Aid monitor: see under Apparatus and equipment
- Blood  
   containing halothane, determining O<sub>2</sub> and CO<sub>2</sub> in (laboratory methods) [Theye], 325  
   electrolytes after fresh-water aspiration [Modell & others], 421  
   electrolytes in human drowning victims [Modell & Davis], 414  
   gas studies during laparoscopy (clinical workshop), 463  
   volume, effects of changes during IPPV [Morgan & others], 297
- Body fluid compartments, method for measuring (clinical workshop), 660
- BONICA, J. J., see MARTIN, W. E., jt. auth.
- Book reviews (Anesthesiologist's Bookshelf), 583
- BOSSMAN, O. G., see MITHOEFER, J. C., jt. auth.
- Brachial plexus block, continuous (clinical workshop), 332
- Brain  
   oxygen consumption and anaerobic glycolysis, effects of cyclopropane and diethyl ether [Matteo & others], 156
- BRODMAN, E. B., see FOLDES, F. F., jt. auth.
- Bronchitic patient, respiratory depression in [Gold & others], 492
- Bronchopulmonary dysplasia in lung injury from oxygen [de Lemos & others], 609
- BROOKS, H. L., see DALEN, J. E., jt. auth.
- BROWN, B. R., see CROUT, J. R., jt. auth.
- BRUCE, D. L., and TRAUIG, H. H., The effect of halothane on the cell cycle in rat small intestine, 401
- , and WINGARD, D. W., The effects of anesthesia on transplant rejection (clinical workshop), 235
- , see LINDE, H. W., jt. auth.
- BRUNNER, E. A., The effects of diethyl ether on carbohydrate metabolism in skeletal muscle, 24
- BUCCIGROSSI, R., see GALLA, S. J., jt. auth.
- BUECHEL, D. R., see DE KREY, J. A., jt. auth.
- , see LARSON, C. P., JR., jt. auth.
- Carbohydrate metabolism in skeletal muscle, effects of diethyl ether on [Brunner], 24
- Carbon dioxide: see also Hypocarbica; Hypercarbica  
   determination in blood containing halothane (laboratory methods) [Theye], 325  
   response curve, rapid version in sedated bronchitic patients [Gold & others], 492  
   tension gradients, arterial-alveolar, after cardiac resuscitation [Suwa & others], 37  
   titration, effect of metabolic acidosis [Mithoefer & others], 395
- Carbon tetrafluoride, anesthetic potency [Eger & others], 129
- Cardiac: see under Heart
- Cardiac resuscitation, arterial-alveolar CO<sub>2</sub> gradient after [Suwa & others], 37
- Cardiocirculatory dynamics  
   role of venous system during spinal and epidural anesthesia [Shimosato & Etsten], 619

- Cardiopulmonary changes following major surgery, graphic analysis (abstract), 337
- CARROLL, R., HEDDEN, M., and SAFAR, P., Tracheostomy cuffs; physical characteristics and physiologic sequelae (abstract), 336
- CASSELLE, D. C., see HORNBEIN, T. F., jt. auth.
- Catecholamines  
adrenal venous during methoxyflurane anesthesia (correspondence), Gronert, 475; Li, 475
- Cell biology, anesthetics and (editorial) [Andersen], 361
- Cell division, effect of halothane [Bruce & Traurig], 401
- Central nervous system: see also under Nerves; Nervous system; Neuromuscular  
anesthetic actions in (editorial) [Miller], 127  
lidocaine action in (editorial) [Munson & Wagman], 3  
lidocaine facilitation of synaptic transmission [de Jong & others], 19  
sympathetic excitation by cyclopropane [Price & others], 426
- Cerebral: see Brain
- Cesarean section: see under Obstetrics
- CHEN, P.-Y., SHANKS, C., GAMBLE, C., and SHIMOSATO, S., Influence of methoxyflurane on myocardial mechanics of the digitalized heart (abstract), 336  
—, see SHIMOSATO, S., jt. auth.
- Children: see also under Pediatrics, Infants  
anesthesia for (review) [Rackow & Salanitri], 208
- Chloroform  
anesthetic potency [Eger & others], 129  
fate (editorial) [Van Dyke], 257  
uptake and metabolism in the mouse [Cohen & Hood], 306
- Chromatography: see under Gas chromatography
- Circulation: see also under Blood; Cardiovascular system  
evaluation in man (editorial) [Smith & Hoffman], 589  
immediate effects of anesthesia (abstract), 339  
pulmonary hemodynamics during general anesthesia in man [Price & others], 629  
venous system during spinal and epidural anesthesia [Shimosato & Etsten], 619
- COHEN, E. N., and HOOD, N., Application of low-temperature autoradiography to studies of the uptake and metabolism of volatile anesthetics in the mouse. I. Chloroform, 306  
—, see FELDMAN, S. A., jt. auth.
- COHEN, P. J., MARSHALL, B. E., and LECKY, J., Effects of halothane on mitochondrial oxygen uptake: site of action (abstract), 337  
—, see HEISTERKAMP, D. V., jt. auth.  
—, see MARSHALL, B. E., jt. auth.
- COLGAN, F. J., and MAHONEY, P. D., A graphic analysis of cardiopulmonary changes following major surgery (abstract), 337
- Computer program for analysis of anesthetic records (clinical workshop), 565
- Conference on Drug Metabolism (report of meeting) [Fink], 116
- Convulsants  
in the cat, electrographic and behavioral study [Tuttle & Elliott], 48
- Convulsions: see also under Seizures  
caused by local anesthetics (editorial) [de Jong], 5
- Convulsive properties of Éthrane, fluorene, halothane and chloroform anesthesia (abstract), 343
- COOK, D. R., GALLA, S. J., and GUALTIERE, W. S., A safer method for measuring body-fluid compartments in patients (abstract), 338  
—, GALLA, S. J., and GUALTIERE, W. S., A safer method for measuring body fluid compartments in patients (clinical workshop), 660
- COOPERMAN, L. H., see PRICE, H. L., jt. auth. (2)
- CORBIN, R. W., see DE JONG, R. H., jt. auth.
- COSMI, E. V., and MARX, G. F., The effect of anesthesia on the acid-base status of the fetus (clinical workshop), 238
- Council of Academic Societies (report of meeting) [Greene], 248
- CRAWFORD, E. W., see MORGAN, B. C., jt. auth.
- CROUT, J. R., and BROWN, B. R., Anesthetic management of pheochromocytoma: the value of phenoxybenzamine and methoxyflurane, 29
- CULLEN, D. J., EGER, E. I., II, and GREGORY, G., Cardiovascular effects of cyclopropane in man (abstract), 338  
—, see EGER, E. I., II, jt. auth.  
—, see SMITH, N. T., jt. auth.
- Cushing's syndrome, adrenalectomy for (clinical workshop), 574
- Cyclopropane  
cardiovascular effects in man (abstract), 338  
central sympathetic excitation by [Price & others], 426  
effects on mental functions [James], 264  
effects on oxygen consumption in brain [Matteo & others], 156  
percutaneous loss [Stoelting & Eger], 278  
pulmonary hemodynamic effects [Price & others], 629
- Cyclopropane-epinephrine effects on Purkinje fibers [Davis & others], 369
- DALEN, J. E., EVANS, G. L., BANAS, J. S., JR., BROOKS, H. L., PARASKOS, J. A., and DEXTER, L., The hemodynamic and respiratory effects of diazepam (Valium), 259  
—, see DEUTSCH, S., jt. auth.
- DAVIS, J. H., see MODEL, J. H., jt. auth.
- DAVIS, L. D., TEMTE, J. V., and MURPHY, Q. R., Epinephrine-cyclopropane effects on Purkinje fibers, 369
- Deadspace, alveolar, increase following cardiac resuscitation [Suwa & others], 37
- Decamethonium, tachyphylaxis to and reversibility by anticholinesterases [Freund], 7
- DE JONG, R. H., Local anesthetic seizures (editorial), 5

- , ROBLES, R., and CORBIN, R. W., Central actions of lidocaine—synaptic transmission, 19
- , ROBLES, R., and MORIKAWA, K.-I., Block of pain transmission by halothane in the spinal cord of the cat (abstract), 339
- DE KREY, J. A., SCHROEDER, C. F., and BUECHEL, D. R., Continuous brachial plexus block (clinical workshop), 332
- DE LEMOS, R., WOLFS DORF, J., NACHMAN, R., BLOCK, A. J., LEIBY, G., WILKINSON, H. A., ALLEN, T., HALLER, J. A., MORGAN, W., and AVERY, M. E., Lung injury from oxygen in lambs: the role of artificial ventilation, 609
- DEUTSCH, S., and DALEN, J. E., Indications for prophylactic digitalization (medical intelligence), 648
- , see BASTRON, R. D., jt. auth.
- DEXTER, L., see DALEN, J. E., jt. auth.
- Diazepam  
hemodynamic and respiratory effects [Dalen & others], 259
- Diethyl ether: see also under Ether  
effects on carbohydrate metabolism in skeletal muscle [Brunner], 24  
effects on oxygen consumption in brain [Matteo & others], 156  
effects on  $\text{Paco}_2$  in dogs with and without nerve blocks [Muallem & others], 185  
effects on ventilation [Larson & others], 174  
lack of hydrate formation [Eger & Shargel], 136
- DIFAZIO, C., see HOFFMAN, J. C., jt. auth.
- DI GIOVANNI, A. J., A technique for selective blockade of the medial antebrachial cutaneous nerve (clinical workshop)
- Digitalization, prophylactic, indications for (medical intelligence) [Deutsch & Dalen], 648
- DILLON, J. B., see WEISMAN, H., jt. auth.
- DIXON, K. L., see NUNN, J. F., jt. auth.
- DNA synthesis, effect of halothane on [Bruce & Traurig], 401
- DOWDY, E. G., and MOORE, W. T., Droperidol and fentanyl combination: effect on the human labyrinth, 604
- Droperidol and fentanyl, effect on labyrinth [Dowdy & Moore], 604
- Drowning, electrolyte changes in [Modell & Davis], 414  
electrolyte changes in [Modell & others], 421
- Drugs: see also under specific drugs and classes of drugs; Anesthetic agents  
vasoactive, effects on reticuloendothelial system in experimental shock [Hershey & Altura], 144
- DUBOIS, A. B., see SMITH, T. C., jt. auth.
- DYKES, M. H. M., Adrenalectomy for Cushing's syndrome—paroxysmal tachycardia and a unique tumor (clinical workshop), 574
- , and FULLER, J. E., Post-transfusion pulmonary edema in surgical patients: etiology and therapeutic use of trimethaphan camphorsulfonate (clinical workshop), 101
- EBNER, H., see PHILLIPS, O. C., jt. auth.
- ECKENHOFF, J. E., Australian Society of Anaesthetists (report of meeting), 580
- Edema, post-transfusion pulmonary in surgical patients (clinical workshop), 101
- EGER, E. I., II, LUNDGREN, C., MILLER, S. L., and STEVENS, W. C., Anesthetic potencies of sulfur hexafluoride, carbon tetrafluoride, chloroform and Ethrane in dogs: correlation with the hydrate and lipid theories of anesthetic action, 129
- , and SHARGEL, R. O., The lack of hydrate formation at a temperature of 0 C of methoxyflurane, halothane, diethyl ether and fluorene, 136
- , see CULLEN, D. J., jt. auth.
- , see GREGORY, G. A., jt. auth.
- , see KADIS, L. B., jt. auth.
- , see LARSON, C. P., JR., jt. auth.
- , see MUALLEM, M., jt. auth.
- , see SMITH, N. T., jt. auth.
- , see STOELTING, R. K., jt. auth. (3)
- EISELE, J. H., TRENCHARD, D., STUBBS, J., and GUZ, A., Immediate circulatory effects of anesthesia in conscious dogs (abstract), 339
- , see LARSON, C. P., JR., jt. auth.
- Electrical stimulation, paired, and halothane, effects on isolated heart muscle (abstract), 341
- Electrolytes  
in drowning victims [Modell & Davis], 414  
after fresh-water aspiration [Modell & others], 421
- ELLIOTT, H. W., see TUTTLE, W. W., jt. auth.
- Epidural anesthesia: see under Anesthesia
- Epinephrine—cyclopropane effects on Purkinje fibers [Davis & others], 369
- EPSTEIN, R. A., WYTE, S. R., JACKSON, S., and SITTER, S., The effects of muscle relaxants and anticholinesterases on the neuromuscular refractory period in anesthetized man (abstract), 340
- , WYTE, S. R., JACKSON, S. H., and SITTER, S., The electromechanical response to stimulation by the Block-Aid Monitor, 43
- Ethchlorvynol poisoning, gas liquid chromatography in management (clinical workshop), 107
- Ether: see also under Diethyl ether  
percutaneous loss [Stoelting & Eger], 278
- Ethrane  
anesthetic potency [Eger & others], 129  
convulsive properties (abstract), 343  
effect on left ventricle (abstract), 351  
effect on myocardial mechanics [Shimosato & others], 506
- Ethyl alcohol  
effect on pulmonary surfactant [Modell & others], 164
- Ethylene oxide  
sterilization, hazards (abstract), 349
- ETSTEN, B. E., see OVADIA, L. O., jt. auth.
- , see SHIMOSATO, S., jt. auth. (4)
- EVANS, G. L., see DALEN, J. E., jt. auth.

- Exhalations, passive [Bergman], 378
- FEINGOLD, A., see LOWE, H. J., jt. auth.
- FIELDER, D. L., NELSON, D. C., ANDERSEN, T. W., and GRAVENSTEIN, J. S., Cardiovascular effects of atropine and neostigmine in man, 637
- FIELDMAN, S. A., COHEN, E. N., and COLLING, R. C., The excretion of gallamine in the dog, 593
- Fetal-maternal relations: see under Obstetrics
- FINK, B. R., Conference on Drug Metabolism (report of meeting), 116
- , KENNY, G. E., and SIMPSON, W. E., III, Depression of oxygen uptake in cell culture by volatile, barbiturate, and local anesthetics, 150
- Fluid compartments  
measurement (abstract), 338  
measurement (clinical workshop), 660
- Fluroxene  
lack of hydrate formation [Eger & Shargel], 136
- FOLDES, F. F., BRODMAN, E. B., KRANZLER, H. N., UNDERWOOD, P. S., and HENSWORTH, B. A., The effects of germinic diacetate on the rat phrenic-nerve-diaphragm preparation (abstract), 340
- FORTNER, R. W. F., see HORNBEIN, T. F., jt. auth.
- FREEMAN, E., see GOLD, M. I., jt. auth.
- Fresh-water aspiration, serum electrolytes after [Modell & Davis], 414  
serum electrolytes after [Modell & others], 421
- FREUND, F. G., Tachyphylaxis to decamethonium and reversibility of the block by anticholinesterase drugs, 7
- , MARTIN, W. E., and HORNBEIN, T. F., The H-reflex as a measure of anesthetic potency in man, 642
- , see MARTIN, W. E., jt. auth.
- FRUMIN, M. J., Spinal anesthesia using a 32-gauge needle, 599
- FULLER, J. E., see DYKES, M. H. M., jt. auth.
- GALLA, S. J., SCHWARZBACH, R., and BUCCIGROSSI, R., A computer program for analysis of anesthetic records (clinical workshop), 565
- , see COOK, D. R., jt. auth. (2)
- Gallamine  
excretion in the dog [Feldman & others], 593
- GAMBLE, C., see CHEN, P.-Y., jt. auth.
- Ganglionic transmission, see under Nervous system
- Gas chromatography  
determination of mepivacaine in blood and urine (laboratory methods) [Maes & others], 657  
management of ethchlorvynol poisoning (clinical workshop), 107
- Germinic diacetate  
effects on rat phrenic-nerve-diaphragm preparation (abstract), 340
- GIAMMOMA, S. T., see MODELL, J. H., jt. auth.
- GILBERT, J. D., see SHIMOSATO, S., jt. auth.
- GIRGIS, K. Z., see KEATS, A. S., jt. auth.
- GISSEN, A. J., and KATZ, R. L., Twitch, tetanus and post-tetanic potentiation as indices of nerve-muscle block in man, 481
- GLUCK, L., see MOTOYAMA, E. K., jt. auth.
- Glycolysis  
anaerobic, of brain, effects of cyclopropane and diethyl ether on [Matteo & others], 156
- GOLD, M. I., Impedance in anesthesiology (clinical workshop), 663
- , REICHENBERG, S., and FREEMAN, E., Respiratory depression in the sedated bronchitic patient: rapid version of the CO<sub>2</sub> response curve, 492
- GOLDBERG, A. H., and PHEAR, W. P. C., The effects of halothane and paired electrical stimulation on isotonic contractions of isolated heart muscle (abstract), 341
- GOLDSTEIN, A., see KEATS, A. S., jt. auth.
- GOLLING, R. C., see FELDMAN, S. A., jt. auth.
- GRAFF, T. D., and BENSON, Ø. W., Systemic and pulmonary changes with inhaled humid atmospheres: clinical application (medical intelligence), 199
- GRAVENSTEIN, J. S., see FIELDER, D. L., jt. auth.
- GREENE, N. M., Council of Academic Societies (report of meeting), 248
- GREGORY, G. A., EGER, E. I., II, and MUNSON, E. S., The relationship between age and halothane requirement in man, 488
- , see CULLEN, D. J., jt. auth.
- GRONERT, G. A., Adrenal venous catecholamines during methoxyflurane anesthesia (correspondence), 475
- , see MICHENFELDER, J. D., jt. auth.
- GUALTIERE, W. S., see COOK, D. R., jt. auth. (2)
- GUNTHEROTH, W. G., see MORGAN, B. C., jt. auth.
- GUZ, A., see EISELE, J. H., jt. auth.
- H-reflex  
as measure of anesthetic potency [Freund & others], 642
- HAGLER, K. J., see LOWE, H. J., jt. auth.
- HALLER, J. A., see DELEMONS, R., jt. auth.
- Halothane  
alteration of effect of isoproterenol (abstract), 350  
block of pain transmission (abstract), 339  
depression of antibody production (abstract), 353  
determination of O<sub>2</sub> and CO<sub>2</sub> content in blood containing (laboratory methods) [Theye], 325  
effect on cell cycle in rat small intestine [Bruce & Traurig], 401  
effect on mitochondrial oxygen uptake (abstract), 337  
effect on mitosis (abstract), 348  
effect on myocardial mechanics [Shimosato & others], 506  
effects of ventilation and solubility on recovery from [Stoelting & Eger], 290  
failure as immunosuppressant in transplant therapy (clinical workshop), 235  
lack of hydrate formation [Eger & Shargel], 136  
liquid, cardiovascular collapse from delivery (clinical workshop), 246

- nitrous oxide and, second gas effect [Stoelting & Eger], 273
- overdose, unusual cardiovascular stability following (clinical workshop), 471
- paired electrical stimulation and, effects on isolated heart muscle (abstract), 341
- percutaneous loss [Stoelting & Eger], 278
- pulmonary hemodynamic effects [Price & others], 629
- requirement and age [Gregory & others], 488
- toxicity, exposure of anesthetists to [Linde & Bruce], 363
- uptake in infants and children [Salanitre & Rackow], 388
- HAN, Y. H., Why do chronic alcoholics require more anesthesia? (abstract), 341
- Heart
- cardiac output and physiologic shunt during anesthesia [Yamamura & others], 406
- cardiovascular effects of atropine and neostigmine [Fielder & others], 637
- contractile state in anesthesia and surgery (review) [Siegel], 519
- digitalization, indications for prophylactic (medical intelligence) [Deutsch & Dalen], 648
- Éthrane effect on myocardial mechanics [Shimosato & others], 513
- halothane-depressed, metabolism and hemodynamics in (abstract), 346
- homotransplantation, anesthesia for [Keats & others], 192
- methoxyflurane effect on myocardial mechanics [Shimosato & others], 506
- monitoring, indirect, during anesthesia (abstract), 343
- Purkinje fibers, cyclopropane-epinephrine effects on [Davis & others], 369
- transplant: see under Homotransplantation
- venous system during spinal and epidural anesthesia [Shimosato & Etsten], 619
- work, nomogram for estimation (clinical workshop), 569
- HEDDEN, M., see CARROLL, R., jt. auth.
- HEDLEY-WHYTE, J., and LAASBERG, L. H., Ethchlorvynol poisoning: gas liquid chromatography in management (clinical workshop), 107
- , see Woo, S. W., jt. auth.
- HEGGERS, J. P., see PETTY, W. C., jt. auth.
- HEINITSH, H., see MODELL, J. H., jt. auth.
- HEISTERKAMP, D. V., SKOVSTED, P., and COHEN, P. J., The effects of small incremental doses of *d*-tubocurarine on neuromuscular transmission in anesthetized man, 500
- Hemodynamics
- blood volume during IPPV [Morgan & others], 297
- Hemolysis
- after fresh-water aspiration [Modell & others], 421
- HENSWORTH, B. A., see FOLDES, F. F., jt. auth.
- HERSHEY, S. G., and ALTURA, B. M., Function of the reticuloendothelial system in experimental shock and combined injury, 138
- , and ALTURA, B. M., The effects of vasoactive drugs on reticuloendothelial function in experimental shock and combined injury, 144
- Hertz (editorial) [Smith], 125
- History of Anesthesia (annals of anesthetic history) [Keys], 447
- HOECH, G. P., JR., see MATTEO, R. S., jt. auth.
- HOFFMAN, J. C., and DI FAZIO, C., A new approach to the evaluation of analgesics (abstract), 342
- HOFFMAN, J. I. E., see SMITH, N. T., jt. auth.
- Homotransplantation
- cardiac, anesthesia for [Keats & others], 192
- renal, anesthesia for (abstract), 335
- HOOD, N., see COHEN, E. N., jt. auth.
- HORNBEIN, T. F., FORTNER, R. W. F., and CASSELLE, D. C., The effect of ventilation on cerebral oxygenation during hypothermia (abstract), 342
- , see FREUND, F. G., jt. auth.
- , see MARTIN, W. E., jt. auth.
- HOSKIN, F. C. G., see MATTEO, R. S., jt. auth.
- HUDDY, R. A., see WEISMAN, H., jt. auth.
- Humid atmospheres, inhaled, systemic and pulmonary changes with (medical intelligence) [Graff & Benson], 199
- HUMPHREY, L. J., see WINGARD, D. W., jt. auth.
- Hydrate theory of anesthesia [Eger & others], 129
- Hydrate theory of anesthesia [Eger & Shargel], 136
- Hypertension
- reserpine treatment and anesthesia (medical intelligence) [Ominsky & Wollman], 443
- Hyperthermia
- acute, oxidative phosphorylation in (medical intelligence) [Wang & others], 439
- during anesthesia (clinical workshop), 472
- Hypocarbica
- effect on postoperative human reaction time (abstract), 354
- Hyponatremia
- after fresh-water aspiration [Modell & others], 421
- Hypotension
- pulse rate in elderly patients during (clinical workshop), 328
- Hypothermia
- effect of ventilation on cerebral oxygenation during (abstract), 342
- Hypoventilation: see under Respiration
- IKEDA, K., see YAMAMURA, H., jt. auth.
- Impedance in anesthesiology (clinical workshop), 663
- Infants, see also under Pediatrics, Children
- anesthesia for (review) [Rackow & Salanitre], 208
- oro-endotracheal tube brace for (clinical workshop), 333
- respiratory studies with Columbia pediatric circle valve (clinical workshop), 330

- Innovar  
  effect on labyrinth [Dowdy & Moore], 604
- Intermittent positive-pressure ventilation, blood volume changes during [Morgan & others], 297
- Intubation, nasal, anesthetizing the nasopharynx prior to (clinical workshop), 111
- IPPV, see Intermittent positive-pressure ventilation
- Isoproterenol  
  alteration of effect by halothane (abstract), 350
- IWATSUKI, N., see SHIMOSATO, S., jt. auth.
- JACKSON, S. H., see EPSTEIN, R. A., jt. auth. (2)
- JAMES, F. M., III, The effects of cyclopropane anesthesia without surgical operation on mental functions of normal man, 264
- JOAS, T. A., and STEVENS, W. C., Convulsive properties of Éthrane, fluoroene, halothane and chloroform anesthesia (abstract), 343
- KADIS, L. B., SMITH, N. T., EGER, E. I., II, WITCHER, C., and CULLEN, D., Indirect methods for monitoring the performance of the heart during anesthesia: the time interval of electrical and mechanical systole (abstract), 343  
—, see SMITH, N. T., jt. auth.
- KAITO, K., see YAMAMURA, H., jt. auth.
- KALLOS, T., and SMITH, T. C., Naloxone-oxy-morphone interaction in man (abstract), 343
- KANANEN, G., see MAES, R., jt. auth.
- KARETAS, A. I., see RUSY, B. F., jt. auth.
- KARIS, J. H., see BARATZ, R. A., jt. auth.
- KATZ, R. L., see GISSEN, A. J., jt. auth.
- KEATS, A. S., STRONG, M. J., GIRGIS, K. Z., and GOLDSTEIN, A., Observations during anesthesia for cardiac homotransplantation in ten patients, 192
- KENNY, G. E., see FINK, B. R., jt. auth.
- KEYS, T. A., The early pneumatic chemists and physicians: their influence on the development of surgical anesthesia (annals of anesthetic history), 447
- Kidney  
  transplants, see under Homotransplantation
- KIKKAWA, Y., see MOTOYAMA, E. K., jt. auth.
- KLINGENMAIER, C. H., see MARSHALL, B. E., jt. auth.
- KOPRIVA, C. J., and LOWENSTEIN, E., An anesthetic accident: cardiovascular collapse from liquid halothane delivery (clinical workshop), 246
- KOSAKA, Y., MARK, L. C., and TAKAHASHI, T., Thiobarbiturate-succinylcholine-oxygen for uncomplicated cesarean section (abstract), 344
- KRANZLER, H. N., see FOLDES, F. F., jt. auth.
- KULOVICH, M. V., see MOTOYAMA, E. K., jt. auth.
- KYE, H. T., and LOWE, H. J., Quantitative programmed closed-circuit methoxyflurane anesthesia (abstract), 345
- KYPSON, J., see NAHAS, G. G., jt. auth.
- LAASBERG, L. H., see HEDLEY-WHYTE, J., jt. auth.
- Labyrinth, effect of droperidol and fentanyl on [Dowdy & Moore], 604
- LAMDIN, S., Poem, 2
- Laparoscopy  
  blood gas studies during (clinical workshop), 463
- LARSON, C. P., JR., EGER, E. I., II, MUALLEM, M., BUECHEL, D. R., MUNSON, E. S., and EISELE, J. H., The effects of diethyl ether and methoxyflurane on ventilation: II. A comparative study in man, 174  
—, see MUALLEM, M., jt. auth.
- LECKY, J., see COHEN, P. J., jt. auth.
- LEIBY, G., see DE LEMOS, R., jt. auth.
- LEIGH, J. M., TYRRELL, M. F., and STRICKLAND, D. A. P., Simplified versions of the shunt and oxygen consumption equations (clinical workshop), 468
- LI, T.-H., Adrenal venous catecholamines during methoxyflurane anesthesia (correspondence), 475  
—, see OVADIA, L. O., jt. auth.
- Lidocaine action in central nervous system (editorial) [Munson & Wagman], 3  
  effects on synaptic transmission [de Jong & others], 19  
  neurologic complications following spinal anesthesia with [Phillips & others], 284
- LINDE, H. W., and BRUCE, D. L., Occupational exposure of anesthetists to halothane, nitrous oxide and radiation, 363
- Lipid theory of anesthesia [Eger & others], 129
- Literature briefs, 119, 251, 355, 476, 585, 667
- LOUGHNANE, M. H., see RUSY, B. F., jt. auth.
- LOVIS, J. D., see NUNN, J. F., jt. auth.
- LOWE, H. J., FEINGOLD, A., and HAGLER, K. J., Unusual cardiovascular stability during deep halothane anesthesia (clinical workshop), 471  
—, see KYE, H. T., jt. auth.
- LOWENSTEIN, E., see KOPRIVA, C. J., jt. auth.
- LUNDGREN, C., see EGER, E. I., II, jt. auth.
- Lungs  
  airways, effects of scopolamine on [Smith & DuBois], 12  
  anesthesia, effect [Bergman], 378  
  blood flow after cardiac resuscitation [Suwa & others], 37  
  circulation in, evaluation (editorial) [Smith & Hoffman], 589  
  compliance (clinical workshop), 663  
  edema in lung injury from oxygen in lambs [de Lemos & others], 609  
  hemodynamics during general anesthesia in man [Price & others], 629  
  impedance in anesthesiology (clinical workshop), 663  
  lavage, hemodynamic and respiratory changes during (abstract), 352  
  surfactant, effects of wetting and antifoaming agents on [Modell & others], 164  
  surfactant in lung injury from oxygen in lambs [de Lemos & others], 609

- surfactant, interactions with anesthetic agents (abstract), 354  
venous admixture with halothane-oxygen anesthesia (abstract), 345  
toxicity of oxygen (editorial) [Morgan], 587
- MACKRELL, T. N., and SCHWARTZ, M., Effects of volatile anesthetics on nonexcitable tissue (abstract), 345
- MAES, R., KANANEN, G., and SUNSHINE, I., Determination of mepivacaine in blood and urine (laboratory methods), 657
- MAHONEY, P. D., see COLGAN, F. J., jt. auth.
- MARK, L. C., see KOSAKA, Y., jt. auth.
- MARSHALL, B. E., COHEN, P. J., AUKBERG, S., and KLINGENMAIER, C. H., Pulmonary venous admixture before, during and after halothane-oxygen anesthesia with spontaneous respiration (abstract), 345  
—, see COHEN, P. J., jt. auth.
- MARTIN, W. E., FREUND, F. G., HORNBEIN, T. F., and BONICA, J. J., Cardiovascular effects of halothane and halothane-nitrous oxide anesthesia during controlled ventilation (abstract), 346  
—, see FREUND, F. G., jt. auth.
- MARK, G. F., and ORKIN, L. R., Use of the Columbia pediatric circle valve for respiratory studies in the neonate (clinical workshop), 330  
—, see COSMI, E. V., jt. auth.
- Mask, anesthetic, see under Apparatus and equipment
- MATTEO, R. S., HOECH, G. P., JR., and HOSKIN, F. C. G., The effects of cyclopropane and diethyl ether on tissue oxygen consumption and anaerobic glycolysis of brain *in vitro*, 156
- Measurement, scientific, methods and units (editorial) [Smith], 125
- MENDENHALL, M. K., see PETTY, W. C., jt. auth.
- Mental functions, human, effects of cyclopropane on [James], 264
- Mepivacaine  
determination in blood and urine (laboratory methods) [Maes & others], 657
- MERIN, R. G., Myocardial metabolism and hemodynamics in the halothane-depressed canine heart (abstract), 346
- Metabolic acidosis  
effect on CO<sub>2</sub> titration [Mithoefer & others], 395
- Metabolism of anesthetics  
chloroform in the mouse [Cohen & Hood], 306
- Methoxyflurane  
effect on myocardial mechanics [Shimosato & others], 506  
effect on myocardial mechanics in the digitalized heart (abstract), 336  
effect on ventilation [Larson & others], 174  
effects of ventilation and solubility on recovery from [Stoelting & Eger], 290  
lack of hydrate formation [Eger & Shargel], 136  
phenoxybenzamine and, in anesthetic management of pheochromocytoma [Crout & Brown], 29
- programmed closed-circuit anesthesia (abstract), 345
- MICHENFELDER, J. D., GRONERT, G. A., and REHDER, K., Neuroanesthesia (review), 65
- MILLAR, R. A., see PRICE, H. L., jt. auth.
- MILLEN, J. E., see SMITH, J. D., jt. auth.
- MILLER, K. W., How do anesthetics work? (editorial), 127
- MILLER, S. L., see EGER, E. I., II, jt. auth.
- MITHOEFER, J. C., BOSSMAN, O. G., and THIBEAULT, D. W., The effect of metabolic acidosis on the CO<sub>2</sub> titration curve, 395
- Mitosis  
anesthetics and (editorial) [Andersen], 361  
effect of halothane [Bruce & Traurig], 401
- MODELL, J. H., and DAVIS, J. H., Electrolyte changes in human drowning victims, 414  
—, HEINITSH, H., and GIAMMOMA, S. T., The effects of wetting and antifoaming agents on pulmonary surfactant, 164  
—, WEIBLEY, T. C., RUIZ, B. C., and NEWBY, E. J., Serum electrolyte concentrations after fresh-water aspiration, 421
- MOFFITT, E. A., see WANG, J. K., jt. auth.
- MOORE, R. H., see MOSTERT, J. W., jt. auth.
- MOORE, W. T., see DOWDY, E. G., jt. auth.
- MORGAN, A. P., The pulmonary toxicity of oxygen (editorial), 587
- MORGAN, B. C., CRAWFORD, E. W., and GUNTHEROTH, W. G., The hemodynamic effects of changes in blood volume during intermittent positive-pressure ventilation, 297
- MORGAN, W., see DE LEMOS, R., jt. auth.
- MORIKAWA, K.-I., see DE JONG, R. H., jt. auth.
- Morphine  
convulsant doses in the cat [Tuttle & Elliott], 48
- MORRIS, J. J., see PRICE, H. L., jt. auth.
- MOSTERT, J. W., MOORE, R. H., and MURPHY, G. P., Nomograms for estimation of peripheral resistance and work of the heart (clinical workshop), 569
- MOTOYAMA, E. K., Conference on airway dynamics (report of meeting), 580  
—, GLUCK, L., KIKKAWA, Y., KULOVICH, M. V., and SUZUKI, Y. O., The effects of inhalation anesthetics on pulmonary surfactant (abstract), 347
- MOYA, F., see USUBIAGA, J. E., jt. auth.
- MUALLEM, M., LARSON, C. P., and EGER, E. I., II. The effects of diethyl ether on P<sub>aCO<sub>2</sub></sub> in dogs with and without vagal, somatic and sympathetic block, 185  
—, see LARSON, C. P., JR., jt. auth.
- MUNSON, E. S., and WAGMAN, I. H., Acid-base changes during lidocaine-induced seizures in *M. mulatta*. (abstract), 347  
—, and WAGMAN, I. H., Action of lidocaine in the central nervous system (editorial), 3  
—, see GREGORY, G. A., jt. auth.  
—, see LARSON, C. P., JR., jt. auth.
- MURPHY, G. P., see MOSTERT, J. W., jt. auth.
- MURPHY, Q. R., see DAVIS, L. D., jt. auth.



## Muscle

- d*-tubocurarine effects on neuromuscular transmission [Heisterkamp & others], 500
- relaxants, effects on neuromuscular refractory period (abstract), 340
- skeletal, effects of diethyl ether on carbohydrate metabolism in [Brunner], 24
- twitch, tetanus, and posttetanic potentiation as indices of nerve block [Gissen & Katz], 481
- Myocardium: see also under Heart
  - contractile state in anesthesia and surgery (review) [Siegel], 519
  - mechanics, effect of Éthrane on [Shimosato & others], 513
  - mechanics, effect of methoxyflurane on [Shimosato & others], 506

NACHMAN, R., see DE LEMOS, R., jt. auth.

NAHAS, G. G., KYPSON, J., TRINER, L., and VULLIEMOZ, Y., The effects of acidosis on glycolysis and pentose shunt in skeletal muscle (abstract), 348

NAKAJIMA, M., see YAMAMURA, H., jt. auth.

## Naloxone

interaction with oxymorphone (abstract), 343

Nasopharynx, anesthetizing prior to awake nasal intubation (clinical workshop), 111

Nebulization: see also under Aerosols; Ultrasonic mists

NELSON, A. T., see PHILLIPS, O. C., jt. auth.

NELSON, D. C., see FIELDER, D. L., jt. auth.

## Neostigmine

cardiovascular effects [Fielder & others], 637

## Nerve, tibial

H-reflex as measure of anesthetic potency [Freund & others], 642

Nerve block: see also Brachial plexus block

Block-Aid monitor in (clinical workshop), 236

effects of diethyl ether on dogs with and without [Muallem & others]

medial antebrachial cutaneous nerve (clinical workshop), 242

## Nerves, sympathetic

excitation by cyclopropane [Price & others], 426

Nervous system: see also Central nervous system

ganglionic transmission during methoxyflurane and halothane anesthesia (abstract), 349

synaptic transmission, facilitation by lidocaine [de Jong & others], 19

Neuroanesthesia (review) [Michenfelder & others], 65

Neuromuscular block twitch, tetanus, and post-tetanic potentiation as indices [Gissen & Katz], 481

## Neuromuscular transmission

Block-Aid monitor in study [Epstein & others], 43

*d*-tubocurarine effects on in anesthetized man [Heisterkamp & others], 500

NEWBY, E. J., see MODEL, J. H., jt. auth.

## Nitrous oxide

effects of ventilation and solubility on recovery from [Stoelting & Eger], 290

failure as immunosuppressant in transplant therapy (clinical workshop), 235

hexamethonium effect on catecholamine response to (abstract), 352

percutaneous loss [Stoelting & Eger], 278

toxicity, exposure of anesthetists to [Linde & Bruce], 363

uptake in infants and children [Salanitre & Rackow], 388

Nomograms for estimation of peripheral resistance and work of the heart (clinical workshop), 569

NUNN, J. F., DIXON, K. L., and LOVIS, J. D., The effects of halothane on mitosis (abstract), 348

## Obstetrics

acid-base status of fetus, effect of anesthesia on (clinical workshop), 238

thiobarbiturate-succinylcholine-oxygen for cesarean section (abstract), 344

OGLESBY, J. E., An oro-endotracheal tube brace for infants (clinical workshop), 333

OKADA, K., see YAMAMURA, H., jt. auth.

OMINSKY, A. J., and WOLLMAN, H., Hazards of general anesthesia in the reserpinized patient (medical intelligence), 443

ORKIN, L. R., see MARX, G. F., jt. auth.

—, see WOLLMAN, S. B., jt. auth.

OVADIA, L. O., LI, T.-H., and ETSTEN, B. E., Mechanisms of ganglionic transmission during methoxyflurane and halothane anesthesia (abstract), 349

Oxidative phosphorylation in acute hyperthermia (medical intelligence) [Wang & others], 439

## Oxygen

consumption equation, simplified (clinical workshop), 468

consumption, in brain, effects of cyclopropane and diethyl ether [Matteo & others], 156

determination in blood containing halothane (laboratory methods) [Theye], 325

pulmonary toxicity (editorial) [Morgan], 587

toxicity in lambs [de Lemos & others], 609

uptake in cell culture, depression by anesthetics [Fink & others], 150

PAPPER, E. M., see SALVATORE, A. J., jt. auth.

PARASKOS, J. A., see DALEN, J. E., jt. auth.

## Pediatric anesthesia

[Salanitre & Rackow], 388

age and halothane requirement [Gregory & others], 488

Pediatric anesthesiology (review) [Rackow & Salanitre], 208

Pentylenetetrazol, convulsant doses in the cat [Tuttle & Elliott], 48

Peripheral resistance, nomogram for estimation (clinical workshop), 569

PESLIN, R. L., The physical properties of ventilators in the inspiratory phase (technical study), 315

- PETTY, W. C., HEGGERS, J. P., SHELTON, D. F., and MENDENHALL, M. K., Viral and bacterial contamination of multiple-dose drug vials kept in anesthesia machines (clinical workshop), 465
- PHEAR, W. P. C., see GOLDBERG, A. H., jt. auth.
- Phenoxybenzamine  
methoxyflurane and in anesthetic management of pheochromocytoma [Crout & Brown], 29
- Pheochromocytoma, anesthetic management [Crout & Brown], 29
- PHILLIPS, O. C., EBNER, H., NELSON, A. T., and BLACK, M. H., Neurologic complications following spinal anesthesia with lidocaine: a prospective review of 10,440 cases, 284
- Physiologic shunt, see under Shunt
- PLOSS, R. E., see PLOSS, W. R., jt. auth.
- PLOSS, W. R., and PLOSS, R. E., A practical stethoscope approximator (letter to editor of clinical workshop), 334
- Poem [Lamdin], 2
- Potency, anesthetic, H-reflex as measure [Freund & others], 642
- PRICE, H. L., COOPERMAN, L. H., WARDEN, J. C., MORRIS, J. J., and SMITH, T. C., Pulmonary hemodynamics during general anesthesia in man, 629
- , WARDEN, J. C., COOPERMAN, L. H., and MILLAR, R. A., Central sympathetic excitation caused by cyclopropane, 426
- Psychological tests of human mental function after cyclopropane [James], 264
- Pulmonary: see Lungs
- Pulse rate changes in elderly patients during hypotension (clinical workshop), 328
- Purkinje fibers, see under Heart
- RACKOW, H., see SALANITRE, E., jt. auth.
- , and SALANITRE, E., Modern concepts in pediatric anesthesiology (review), 208
- Radiation hazard to anesthetists [Linde & Bruce], 363
- Records, anesthetic, computer program for analysis (clinical workshop), 565
- REICHENBERG, S., see GOLD, M. I., jt. auth.
- REHDER, K., see MICHENFELDER, J. D., jt. auth.
- RENDELL-BAKER, L., and ROBERTS, R. B., Hazards of ethylene oxide sterilization (abstract), 349
- Reserpine  
hazards of anesthesia following (medical intelligence) [Ominsky & Wollman], 443
- Respiration: see also under Ventilation  
artificial, role in lung injury from oxygen in lambs [de Lemos & others], 609  
depression of in sedated bronchitic patient [Gold & others], 492  
exhalations, passive, in anesthetized subjects [Bergman], 378  
humid atmospheres, inhalation of (medical intelligence) [Graff & Benson], 199  
hypoventilation, postoperative and hypoxia following hyperventilation (abstract), 351
- Respirator: see under Apparatus and equipment
- Resuscitation, cardiac, arterial-alveolar CO<sub>2</sub> gradient after [Suwa & others], 37
- Reticuloendothelial system  
in experimental shock [Hershey & Altura], 138  
in experimental shock, effects of vasoactive drugs on [Hershey & Altura], 144
- RING, W. H., Standardization of inhalation anesthetic equipment (clinical workshop), 112
- ROBERTS, R. B., see RENDELL-BAKER, L., jt. auth.
- ROBIN, E. D., see SMITH, J. D., jt. auth.
- ROBLES, R., see DE JONG, R. H., jt. auth. (2)
- ROSEVEAR, J. W., see WANG, J. K., jt. auth.
- RUTZ, B. C., see MODEL, J. H., jt. auth.
- RUSY, B. F., TALLARIDA, R. J., KARETAS, A. I., and LOUGHNANE, M. H., Alteration, by halothane, of the effect of isoproterenol on maximum acceleration of ejected left-ventricular blood (abstract), 350
- SABAWALA, P. B., Correlation of mechanical and electrical events in depolarization paralysis of isolated human intercostal muscle (abstract), 350
- SAFAR, P., see CARROLL, R., jt. auth.
- , see SMITH, J. D., jt. auth.
- SALANITRE, E., and RACKOW, H., The pulmonary exchange of nitrous oxide and halothane in infants and children, 388
- , see RACKOW, H., jt. auth.
- SALEM, M. R., Pulse-rate changes in elderly patients during deliberate hypotension (clinical workshop), 328
- Salt-water aspiration, serum electrolytes after [Modell & Davis], 414
- SALVATORE, A. J., SULLIVAN, S. F., and PAPPER, E. M., Postoperative hypoventilation and hypoxia in man following hyperventilation (abstract), 351
- SATNICK, J. H., Hyperthermia under anesthesia with regional muscle flaccidity (clinical workshop), 472
- SCHROEDER, C. F., see DE KREY, J. A., jt. auth.
- SCHWARTZ, M., see MACKRELL, T. N., jt. auth.
- SCHWARZBACH, R., see GALLA, S. J., jt. auth.
- Scopolamine, effects on the airways of man [Smith & DuBois], 12
- Second gas effect, explanation for [Stoelting & Eger], 273
- Sedation of bronchitic patients [Gold & others], 492
- Seizures: see also under Convulsions  
lidocaine-induced, acid-base changes in (abstract), 347
- Serum, see under Blood
- SHANKS, C., see CHEN, P.-Y., jt. auth.
- SHARGEL, R. O., see EGER, E. I., II, jt. auth.
- SHELTON, D. F., see PETTY, W. C., jt. auth.
- SHIMOSATO, S., CHEN, P.-Y., GILBERT, J. D., and ETSTEN, B. E., Effect of Æthane on the performance of the left ventricle (abstract), 351
- , and ETSTEN, B. E., The role of the venous system in cardiocirculatory dynamics during spinal and epidural anesthesia in man, 619

- , SUGAI, N., and ETSTEN, B. E., The effect of methoxyflurane on the inotropic state of myocardial muscle, 506
- , SUGAI, N., IWATSUKI, N., and ETSTEN, B. E., The effect of Ethrane on cardiac muscle mechanics, 513
- , see CHEN, P.-Y., jt. auth.
- Shock**
- experimental, effects of vasoactive drugs on reticuloendothelial system in [Hershey & Altura], 144
- experimental, reticuloendothelial system in [Hershey & Altura], 138
- SHOUKAS, J. A., STONER, T. R., JR., and URBACH, K. F., A simple method of anesthetizing the nasopharynx prior to awake nasal intubation (clinical workshop), 111
- Shunt, physiologic, relationship to cardiac output during anesthesia [Yamamura & others], 406
- Shunt equation, simplified (clinical workshop), 468
- SIEGEL, J. H., The myocardial contractile state and its role in the response to anesthesia and surgery (review), 519
- SIMPSON, W. E., III, see FINK, B. R., jt. auth.
- SITTER, S., see EPSTEIN, R. A., jt. auth. (2)
- Skin**
- percutaneous loss of anesthetics [Stoelting & Eger], 278
- SKOVSTED, P., see HEISTERKAMP, D. V., jt. auth.
- SMITH, J. D., MILLEN, J. E., SAFAR, P., and ROBIN, E. D., Hemodynamic and respiratory changes during pulmonary lavage (abstract), 352
- SMITH, N. T., EGER, E. I., II, KADIS, L. B., and CULLEN, D., The effect of hexamethonium on the catecholamine response to nitrous oxide in man (abstract), 352
- , and HOFFMAN, J. I. E., Evaluation of the circulation—pulmonary and otherwise—in man (editorial), 589
- , see KADIS, L. B., jt. auth.
- SMITH, T. C., Editorial: toward better measurement (editorial), 125
- , and DuBois, A. B., The effects of scopolamine on the airways of man, 12
- , see KALLOS, T., jt. auth.
- , see PRICE, H. L., jt. auth.
- Spinal anesthesia: see under Anesthesia
- STEVENS, W. C., see EGER, E. I., II, jt. auth.
- , see JOAS, T. A., jt. auth.
- STOELTING, R. K., and EGER, E. I., II, An additional explanation for the second gas effect: a concentrating effect, 273
- , and EGER, E. I., II, Percutaneous loss of nitrous oxide, cyclopropane, ether and halothane in man, 278
- , and EGER, E. I., II, The effects of ventilation and anesthetic solubility on recovery from anesthesia: an *in vivo* and analog analysis before and after equilibrium, 290
- STONER, T. R., JR., see SHOUKAS, J. A., jt. auth.
- STRICKLAND, D. A. P., see LEICH, J. M., jt. auth.
- STRONG, M. J., see KEATS, A. S., jt. auth.
- STUBBS, J., see EISELE, J. H., jt. auth.
- Succinylcholine
- effect of tetracaine on liberation of potassium by (abstract), 353
- SUGAI, N., see SHIMOSATO, S., jt. auth. (2)
- Sulfur hexafluoride
- anesthetic potency [Eger & others], 129
- SULLIVAN, S. F., see SALVATORE, A. J., jt. auth.
- SUNSHINE, I., see MAES, R., jt. auth.
- Surfactants: see also under Lungs
- effects of wetting and antifoaming agents [Modell & others], 164
- SUWA, K., YAMAGUCHI, Y., and YAMAMURA, H., Arterial-alveolar CO<sub>2</sub> gradient after cardiac resuscitation in the dog, 37
- SUZUKI, Y. O., see MOTOYAMA, E. K., jt. auth.
- Sympathetic block
- effects of diethyl ether on P<sub>aCO<sub>2</sub></sub> in dogs with [Muallem & others], 185
- Synaptic transmission, facilitation by lidocaine [de Jong & others], 19
- Tachycardia, paroxysmal, during adrenalectomy for Cushing's syndrome (clinical workshop), 574
- Tachyphylaxis to decamethonium and reversibility by anticholinesterase drugs [Freund], 7
- TAKAHASHI, T., see KOSAKA, Y., jt. auth.
- TALLARIDA, R. J., see RUSY, B. F., jt. auth.
- TEMTE, J. V., see DAVIS, L. D., jt. auth.
- Tetanus**
- as index of nerve-muscle block [Gissen & Katz], 481
- THEYE, R. A., The determination of O<sub>2</sub> and CO<sub>2</sub> content in blood containing halothane (laboratory methods), 325
- THIBEAULT, D. W., see MITHOEFER, J. C., jt. auth.
- Thiopental**
- effect on sodium transport in toad bladder (abstract), 335
- Thorax**
- properties during anesthesia [Bergman], 378
- Torr (editorial) [Smith], 125
- Toxicity**
- halothane and nitrous oxide [Linde & Bruce], 363
- oxygen (editorial) [Morgan], 587
- Transplants: see also under Homotransplantation
- cardiac, anesthesia for [Keats & others], 192
- rejection, effects of anesthesia on (clinical workshop), 235
- TRAURIG, H. H., see BRUCE, D. L., jt. auth.
- TRENCHAND, D., see EISELE, J. H., jt. auth.
- Trimethaphan**
- in treatment of pulmonary edema (clinical workshop), 101
- TRINER, L., see NAHAS, G. G., jt. auth.
- d*-Tubocurarine
- effects on neuromuscular transmission during anesthesia [Heisterkamp and others], 500
- TUTTLE, W. W., and ELLIOTT, H. W., Electrographic and behavioral study of convulsants in the cat, 48

- Twitch**  
as index of nerve-muscle block [Gissen & Katz], 481  
tension after *d*-tubocurarine [Heisterkamp & others], 500  
TYRRELL, M. F., see LEIGH, J. M., jt. auth.
- Ultrasonic mists**  
inhaled, systemic and pulmonary changes with (medical intelligence) [Graff & Benson], 199  
UNDERWOOD, P. S., see FOLDES, F. F., jt. auth.
- Uptake of anesthetics**  
chloroform in the mouse [Cohen & Hood], 306  
URBACH, K. F., see SHOUKAS, J. A., jt. auth.
- USUBIAGA, J. E., MOYA, F., USUBIAGA, L. E., and VESTAL, B., The effect of tetracaine on the liberation of potassium produced by succinylcholine (abstract), 353  
—, see USUBIAGA, J. E., jt. auth.
- Vagal block**  
effects of diethyl ether on  $P_{aCO_2}$  in dogs with [Muallem & others], 185  
VANDAM, L. D., Space conflict (editorial), 1  
—, see BASTRON, R. D., jt. auth.
- VAN DYKE, R. A., On the fate of chloroform (editorial), 257
- Vaporizer, see under Apparatus and equipment
- Vasoactive drugs, see Drugs, vasoactive
- Veins**  
role in cardiocirculatory dynamics during spinal and epidural anesthesia [Shimosato & Etsten], 619
- Ventilation**  
effects of diethyl ether and methoxyflurane [Larson & others], 174  
effects of diethyl ether in dogs with and without nerve blocks [Muallem & others], 185  
effects on recovery from anesthesia [Stoelting & Eger], 290  
Ventilator: see under Apparatus and equipment  
VESTAL, B., see USUBIAGA, J. E., jt. auth.
- Vestibular system, effect of droperidol and fentanyl [Dowdy & Moore], 604
- Viral contamination of drug vials in anesthesia machines (clinical workshop), 465
- Volatile anesthetics: see Anesthetic agents, volatile
- VULLIEMOZ, Y., see NAHAS, G. G., jt. auth.
- WAGMAN, I. H., see MUNSON, E. S., jt. auth. (2)
- WANG, J. K., MOFFITT, E. A., and ROSEVEAR, J. W., Oxidative phosphorylation in acute hyperthermia (medical intelligence), 439
- WARDEN, J. C., see PRICE, H. L., jt. auth. (2)
- WEIBLEY, T. C., see MODELL, J. H., jt. auth.
- WEISMAN, H., BAUER, R. O., HUDDY, R. A., and DILLON, J. B., Clinical evaluation of a new anesthetic mask (clinical workshop), 244
- Wetting agent (Alevaire), effect on pulmonary surfactant [Modell & others], 164
- WILKINSON, H. A., see DE LEMOS, R., jt. auth.
- WINGARD, D. W., and HUMPHREY, L. J., Depression of antibody production by halothane: a dose response (abstract), 353  
—, see BRUCE, D. L., jt. auth.
- WITCHER, C., see EGER, E. I., II, jt. auth.
- WOLFSBORF, J., see DE LEMOS, R., jt. auth.
- WOLLMAN, H., see OMINSKY, A. J., jt. auth.
- WOLLMAN, S. B., and ORKIN, L. R., Postoperative human reaction time and hypocarbia during anesthesia (abstract), 354
- WOO, S. W., BERLIN, A. M., and HEDLEY-WHYTE, J., Comparison of effects of nitrous oxide, chloroform and halothane on surfactant function in excised dogs' lungs (abstract), 354
- WRIGHT, B. D., A new use for the Block-Aid monitor (clinical workshop), 236
- WYTE, S. R., see EPSTEIN, R. A., jt. auth. (2)
- YAMAGUCHI, Y., see SUWA, K., jt. auth.
- YAMAMURA, H., KAITO, K., IKEDA, K., NAKAJIMA, M., and OKADA, K., The relationship between physiologic shunt and cardiac output in dogs under general anesthesia, 406  
—, see SUWA, K., jt. auth.
